# Supplementary material for: The Mediating Role of Psychological Balance on the Effects of Dietary Behavior on Cognitive Impairment in Chinese Elderly
Source: MDPI journal article supplement (doi:10.3390/nu16060908), 2024-03-21
Supplement: s1 [file s1]

## Supplementary Material

**Table S1.** The response probabilities of seven food groups in four dietary patterns in the subjects (n, %).

| Cluster | Vegetables    | Fruits        | Red Meat      | Fish         | Eggs          | Beans-nuts   | Milk         |
|---------|---------------|---------------|---------------|--------------|---------------|--------------|--------------|
| DP 1    | 2896 (85.63)  | 915 (27.05)   | 2044 (60.44)  | 639 (18.89)  | 0 (0.00)      | 546 (16.14)  | 280 (8.27)   |
| DP 2    | 2383 (81.64)  | 951 (32.58)   | 1353 (46.35)  | 0 (0.00)     | 2765 (94.72)  | 905 (31.00)  | 1074 (36.79) |
| DP 3    | 2937 (87.59)  | 0 (0.00)      | 3159 (84.21)  | 2529 (75.42) | 3137 (93.56)  | 2488 (74.20) | 1246 (37.16) |
| DP 4    | 4586 (98.33)  | 4664 (100.00) | 4449 (95.39)  | 3598 (77.14) | 4418 (94.73)  | 3426 (73.46) | 2990 (64.11) |
| Total   | 12802 (89.41) | 6530 (45.61)  | 11005 (76.86) | 6766 (47.26) | 10320 (72.08) | 7365 (51.44) | 5590 (39.04) |
